# Supplementary material
Source: PubMed Central journal article supplement (PMC4400200)
Supplement: supp_dev055_dev055suppl_table2.pdf [file supp_dev055_dev055suppl_table2.pdf]

**Supplementary Table SII Matrix metalloprotein (MMP) secretion in response to vehicle (V), 10 nM estradiol (E<sub>2</sub>) and 10 nM E<sub>2</sub> + 1 μM progesterone (E<sub>2</sub>P<sub>4</sub>) treatment in different study groups at day 14.**

| pg/10 <sup>5</sup> cells | Group  | V                             | E <sub>2</sub>                  | E <sub>2</sub> P <sub>4</sub>     |
|--------------------------|--------|-------------------------------|---------------------------------|-----------------------------------|
| MMP1                     | Ctrl   | 9126 ± 5418                   | 1700 ± 796                      | 3019 ± 1792                       |
|                          | dPCOS  | 9676 ± 4306                   | 4165 ± 2082                     | 8341 ± 4506                       |
|                          | ndPCOS | 19 572 ± 10 398               | 29 998 ± 28277                  | 127 27 ± 9367                     |
| MMP2                     | Ctrl   | 4471 ± 276 <sup>d,e</sup>     | 4735 ± 182 <sup>e</sup>         | 7521 ± 251 <sup>b,c,e</sup>       |
|                          | dPCOS  | 4803 ± 221                    | 6365 ± 340 <sup>a</sup>         | 7588 ± 527 <sup>b</sup>           |
|                          | ndPCOS | 8459 ± 220                    | 6650 ± 102 <sup>a</sup>         | 10 145 ± 325 <sup>b,c</sup>       |
| MMP3                     | Ctrl   | 191 621 ± 36 465 <sup>e</sup> | 130 130 ± 25 438 <sup>d,e</sup> | 109 504 ± 34 949 <sup>b,d,e</sup> |
|                          | dPCOS  | 231 897 ± 8091                | 145 780 ± 35 605                | 103 724 ± 22 692                  |
|                          | ndPCOS | 356 735 ± 53 518              | 289 786 ± 37 860                | 287 454 ± 49 819                  |
| MMP7                     | Ctrl   | N/A                           | N/A                             | N/A                               |
|                          | dPCOS  | 166.83 ± 103.20               | N/A                             | N/A                               |
|                          | ndPCOS | 431.58 ± 187.41               | 482.85 ± 163.05                 | 298.04 ± 177.69                   |
| MMP10                    | Ctrl   | 3849 ± 2160                   | 2062 ± 769                      | 5533 ± 1852                       |
|                          | dPCOS  | 3485 ± 2049                   | 3312 ± 1293                     | 2818 ± 1009                       |
|                          | ndPCOS | 9398 ± 6244                   | 8948 ± 2573                     | 4619 ± 1514                       |
| MMP12                    | Ctrl   | 1140 ± 723                    | 174 ± 107                       | 516 ± 314                         |
|                          | dPCOS  | 851 ± 103                     | 237 ± 70                        | 487 ± 139                         |
|                          | ndPCOS | 2781 ± 1636                   | 718 ± 170                       | 1357 ± 521                        |

D Ctrl, eSF from controls; dPCOS eSF from women with PCOS (8/12), that exhibit decidualization; ndPCOS, eSF from women with PCOS (4/12), that did not decidualize.

<sup>a</sup>V versus E<sub>2</sub>.

<sup>b</sup>V versus E<sub>2</sub>P<sub>4</sub>.

<sup>c</sup>E<sub>2</sub> versus E<sub>2</sub>P<sub>4</sub>.

<sup>d</sup>Ctrl versus dPCOS.

<sup>e</sup>Ctrl versus ndPCOS.

<sup>f</sup>dPCOS versus ndPCOS.

MMP9, MMP13 not detected.
